# Supplementary material for: Design of a Mechatronics Model of Urinary Bladder and Realization and Evaluation of Its Prototype
Source: Hindawi journal article supplement (doi:10.1155/2019/9431781), 2019-12-18
Supplement: f1 [file 9431781.f1.zip]



# Liquid Flow Sensor Solutions

Experts for Smart Sensor Solutions

**SENSIRION**  
THE SENSOR COMPANY

# Inspiring Liquid Flow Sensor Technology

Sensirion's liquid flow meters establish new standards wherever monitoring of low liquid flow rates, liquid handling, and liquid dispensing is important. Our unique CMOSens® Technology allows measuring the liquid flow bidirectionally through the wall of the sensor's flow channel from hundreds of milliliters per minute down to single-digit nanoliters per minute. Applications in fields like medical devices, diagnostics as well as process and automation technology benefit daily from our safe and reliable sensor solutions.

For more information, please visit: [www.sensirion.com/liquidflow](http://www.sensirion.com/liquidflow)

## PATENTED TECHNOLOGY

Sensirion's CMOSens® flow sensor technology is based on a thermal microsensor and is most effective at very low flow rates. The key element in our products is an integrated digital CMOSens® microchip bonded to the outside of the sensor's flow channel, which measures precisely through the wall of the flow channel. Our liquid flow meters offer completely media-isolated flow sensing with no moving parts or obstacles in the flow path. We offer our customers the world's smallest and most precise liquid flow meters and inspire new designs and applications throughout all industries. High reliability and perfect media compatibility make our sensors ideal for use in medical and life sciences, diagnostics, factory automation and energy management applications.

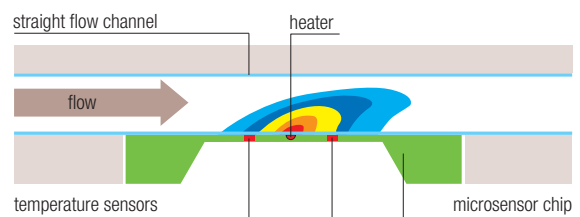

Flow measurement principle

## FAST, SMALL, RELIABLE

Sensirion's standard liquid flow meters provide exceptional value for money and eliminate the need for investment in application-specific OEM sensor development. The inert wetted materials ensure excellent process compatibility, industry-standard fluidic fittings enable quick assembly into the fluidic line, and downmount fittings allow compact installation in manifold systems. Through the use of capillaries with different diameters, Sensirion's liquid flow meters cover flow rates over six orders of magnitude from single-digit nanoliters up to a few hundred milliliters per minute.

In addition to the sensor element, the CMOSens® chip integrates the complete digital intelligence and memory for signal linearization, temperature compensation and self-test algorithms. Different digital (I<sup>2</sup>C, RS485, USB) or analog output options are available for easy testing and seamless integration. Please contact our experts to discuss possible options for customized solutions: [info@sensirion.com](mailto:info@sensirion.com)

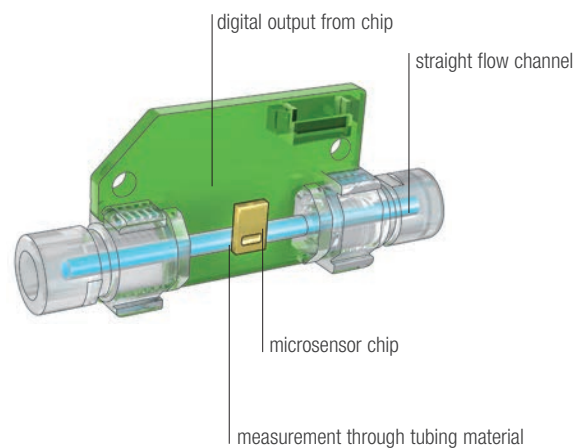

Schematic layout of a liquid flow meter

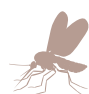

Mosquito drinking  
ca. 10 µl/min

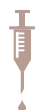

Drug injection  
ca. 5 ml/min

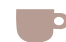

Espresso machine  
ca. 250 ml/min

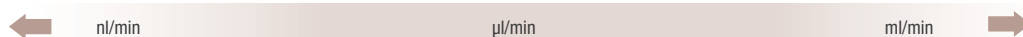

Sensirion is able to measure flow rates from single-digit nl/min up to several hundred ml/min. Contact us if you require higher flow rates.

# Selection of Sensirion's Liquid Flow Meters

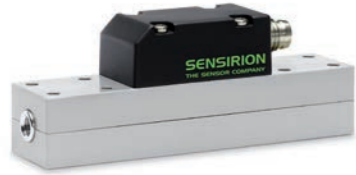

## SLG SERIES

SLG liquid flow meters for ultra-low flow rates (down to single-digit nanoliters per minute) are the perfect solution for dynamic liquid flow monitoring at high pressures and/or low flow rates, such as cutting-edge UHPLC applications. The fused silica flow channel withstands pressures of up to 1200 bar.

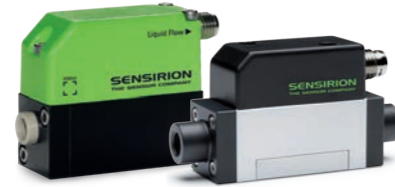

## SLI/SLS SERIES

With Sensirion's flow meter technology in a protective housing, SLI/SLS liquid flow meters are ideal for laboratory work and for use in the automation industry. In combination with the SCC1 sensor cables, they provide RS485, analog or USB output for reliable communication in harsh environments.

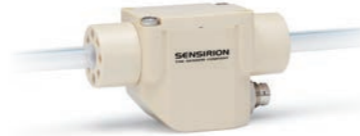

## SLQ-QT500

A calibrated flow rate range of up to 120 ml/min and the exclusive use of high-purity wetted materials (quartz glass, PFA) make this sensor ideal for dispensing processes in demanding applications, such as the semiconductor industry, and for the measurement of liquids with high viscosity or containing particles.

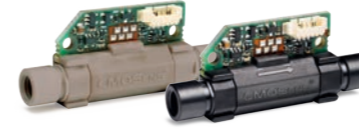

## LG16/LG01 SERIES

The small footprint of the LG16 series makes it the ideal choice for the integration of a liquid flow sensor into OEM devices. It is available in a digital version with I<sup>2</sup>C communication and a 0 - 5V analog output version. The LG01 liquid flow switch is the perfect solution for the detection of flow, bubbles and leakages.

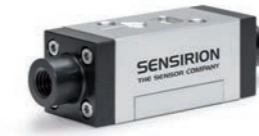

## LS32-1500

The LS32-1500 comes in a compact housing with high mechanical robustness. The wetted materials provide exceptional chemical resistance. In addition to its suitability for the biomedical market, it also offers a cost-effective, compact and reliable solution for many applications with flow rates of up to 40 ml/min.

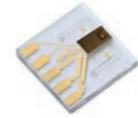

## LPG10 SERIES

The LPG10 series represents our smallest liquid flow sensors and enables outstanding performance and speed in a very small form factor. The innovative design enables flow measurement in a planar microfluidic glass substrate. Downmount fluidic ports allow compact integration into manifold systems.

|       | Model       | Full Scale Flow Rates                        | Accuracy of Measured Value | Bidirectional Operation | Output                                               |       |                  | Maximum Cable Length                          | Fluidic Connector Ports                              | Maximum Pressure | Model       | nl/min      |     | µl/min |    | ml/min |   |    |     |
|-------|-------------|----------------------------------------------|----------------------------|-------------------------|------------------------------------------------------|-------|------------------|-----------------------------------------------|------------------------------------------------------|------------------|-------------|-------------|-----|--------|----|--------|---|----|-----|
|       |             |                                              |                            |                         | Analog                                               | RS485 | I <sup>2</sup> C |                                               |                                                      |                  |             | 10          | 100 | 1      | 10 | 100    | 1 | 10 | 100 |
| SLG   | SLG-0025    | 1.5 µl/min H <sub>2</sub> O                  | 10%                        |                         | 0 to 10V                                             | ✓     | ✓                | > 100 m for RS485, 30 cm for I <sup>2</sup> C | Stainless steel 10-32 coned port for 1/16" OD tubing | 1200 bar         | SLG-0025    | [Bar chart] |     |        |    |        |   |    |     |
|       | SLG-0075    | 5 µl/min H <sub>2</sub> O                    | 10%                        | Yes                     | 0 to 10V                                             | ✓     | ✓                | > 100 m for RS485, 30 cm for I <sup>2</sup> C |                                                      | 1200 bar         | SLG-0075    | [Bar chart] |     |        |    |        |   |    |     |
|       | SLG-0150    | 8 µl/min H <sub>2</sub> O                    | 5%                         |                         | 0 to 10V                                             | ✓     | ✓                | > 100 m for RS485, 30 cm for I <sup>2</sup> C |                                                      | 500 bar          | SLG-0150    | [Bar chart] |     |        |    |        |   |    |     |
| SLI   | SLI-0430    | 80 µl/min H <sub>2</sub> O<br>500 µl/min HC  |                            |                         |                                                      |       |                  |                                               | ¼-28 flat-bottom for 1/16" or 1/8" OD plastic tubing | 50 bar           | SLI-0430    | [Bar chart] |     |        |    |        |   |    |     |
|       | SLI-1000    | 1 ml/min H <sub>2</sub> O<br>10 ml/min HC    | 5%                         | Yes                     | 0 to 10V                                             | ✓     | ✓                | > 100 m for RS485, 30 cm for I <sup>2</sup> C |                                                      | 12 bar           | SLI-1000    | [Bar chart] |     |        |    |        |   |    |     |
|       | SLI-2000    | 5 ml/min H <sub>2</sub> O<br>80 ml/min HC    |                            |                         |                                                      |       |                  |                                               |                                                      | 12 bar           | SLI-2000    | [Bar chart] |     |        |    |        |   |    |     |
| SLS   | SLS-1500    | 40 ml/min H <sub>2</sub> O                   | 10%                        | Yes                     | 0 to 10V                                             | ✓     | ✓                | > 100 m for RS485, 30 cm for I <sup>2</sup> C | ¼-28 flat-bottom for 1/8" OD tubing                  | 12 bar           | SLS-1500    | [Bar chart] |     |        |    |        |   |    |     |
| SLQ   | SLQ-QT105   | 120 ml/min HC                                | 10%                        |                         | 0 to 10V                                             | ✓     | ✓                | > 100 m for RS485, 30 cm for I <sup>2</sup> C | Super 300 type pillar fitting 4x3 mm                 | 12 bar           | SLQ-QT105   | [Bar chart] |     |        |    |        |   |    |     |
|       | SLQ-QT500   | 120 ml/min H <sub>2</sub> O<br>120 ml/min HC | 10%                        | Yes                     | 0 to 10V                                             | ✓     | ✓                | > 100 m for RS485, 30 cm for I <sup>2</sup> C | PFA tube with 6.35 mm (¼") OD, 4.35 mm ID            | 12 bar           | SLQ-QT500   | [Bar chart] |     |        |    |        |   |    |     |
| LG16  | LG16-0025   | 1.5 µl/min H <sub>2</sub> O                  | 10%                        |                         | 0 to 5V                                              |       | ✓                |                                               | UNF 6-40 con for 1/32" OD tubing                     | 200 bar          | LG16-0025   | [Bar chart] |     |        |    |        |   |    |     |
|       | LG16-0150   | 7 µl/min H <sub>2</sub> O<br>70 µl/min HC    |                            |                         | 0 to 5V                                              |       | ✓                |                                               |                                                      | 200 bar          | LG16-0150   | [Bar chart] |     |        |    |        |   |    |     |
|       | LG16-0430   | 80 µl/min H <sub>2</sub> O<br>500 µl/min HC  |                            |                         | 0 to 5V                                              |       | ✓                |                                               |                                                      | 100 bar          | LG16-0430   | [Bar chart] |     |        |    |        |   |    |     |
|       | LG16-1000   | 1 ml/min H <sub>2</sub> O<br>10 ml/min HC    | 5%                         | Yes                     | 0 to 5V                                              |       | ✓                | 30 cm for I <sup>2</sup> C                    |                                                      | 15 bar           | LG16-1000   | [Bar chart] |     |        |    |        |   |    |     |
|       | LG16-2000   | 5 ml/min H <sub>2</sub> O                    |                            |                         | 0 to 5V                                              |       | ✓                |                                               |                                                      | 15 bar           | LG16-2000   | [Bar chart] |     |        |    |        |   |    |     |
|       | LG16-2000HC | 80 ml/min HC                                 |                            |                         |                                                      |       | ✓                |                                               |                                                      | 15 bar           | LG16-2000HC | [Bar chart] |     |        |    |        |   |    |     |
| LS32  | LS32-1500   | 40 ml/min H <sub>2</sub> O                   | 10%                        | Yes                     |                                                      |       | ✓                | 30 cm for I <sup>2</sup> C                    | ¼-28 flat-bottom for 1/8" OD tubing                  | 12 bar           | LS32-1500   | [Bar chart] |     |        |    |        |   |    |     |
| LPG10 | LPG10-0500  | 100 µl/min H <sub>2</sub> O                  |                            |                         |                                                      |       | ✓                |                                               | Downmount                                            | 10 bar           | LPG10-0500  | [Bar chart] |     |        |    |        |   |    |     |
|       | LPG10-1000  | 1 ml/min H <sub>2</sub> O                    | 5%                         | Yes                     |                                                      |       | ✓                | 30 cm for I <sup>2</sup> C                    |                                                      | 3 bar            | LPG10-1000  | [Bar chart] |     |        |    |        |   |    |     |
| LG01  | LG01-2000   | Switch level: 0.25 ml/min or 4.5 ml/min      | 10%                        | No                      | 0V: no flow or bubble<br>5V: flow above switch level |       |                  | 3 m                                           | ¼-28 flat-bottom for 1/16" or 1/8" OD plastic tubing | 3 bar            | LG01-2000   | [Bar chart] |     |        |    |        |   |    |     |

Calibrated flow rates for ■ water (H<sub>2</sub>O) ■ hydrocarbons (HC)

Semiconductors  
Analytical Instruments

Medical

Diagnostics

Automation

# A Single-Use Liquid Flow Sensor – the LD20 Series

Nowadays, keywords and trends such as point-of-care, patient compliance, complex drug administration and wearable designs demand the development of smart medical devices. The single-use LD20 liquid flow sensor measures liquid flow rates of up to 1300 ml/h safely and reliably at the point of interest, enabling a more direct and effective patient treatment. The LD20 series combines Sensirion's proven liquid flow sensing technology with a single-use cost-effective design for high-volume applications in the biomedical, life sciences and food industry sectors.

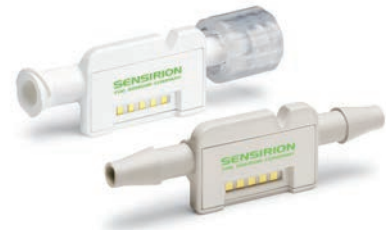

Detects failure modes during drug delivery (occlusion, air-in-line, infiltration...)

## Liquid Flow Meter Kits

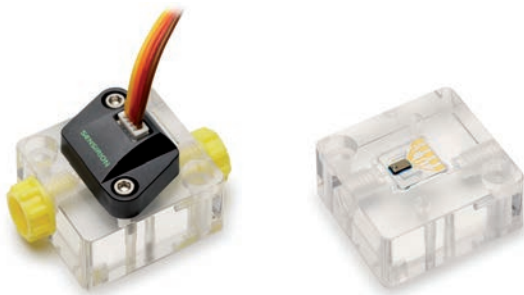

LPG10 Evaluation Kit

In order to conduct initial measurements quickly and easily, all our SLI, SLS, SLG, and SLQ liquid flow meters can be ordered as part of a Liquid Flow Meter Kit. In addition to the liquid flow meter of your choice, the kit also contains USB and analog interface cables for electrical connection, viewer and logging software, and a set of fluidic connectors. For liquid flow sensors in the LPG10 and LD20 series, we offer specific evaluation kits that include a pre-assembled manifold body for the LPG10 series or a base station for electrical connection of the contact pads for the LD20 series.

For more information please visit: [www.sensirion.com/liquidflowmeterkit](http://www.sensirion.com/liquidflowmeterkit)

## Customized Solutions

Innovative ideas sometimes demand new solutions and Sensirion's sensor experts are always keen on finding ways to make interesting applications happen through our technology. Customized solutions can be designed for special requirements, such as flow rates, limited space constraints, resistance to aggressive chemicals, and dedicated low-price and even disposable sensor designs for high-volume applications.

Our cutting-edge sensor technology and unique expertise in liquid flow sensing has led to many successful customer projects. The essential goal is to understand the requirements of our customers and to implement the key benefits of our technology skillfully to their advantage: modification of the packaging, the wetted materials, the fluidic or electrical interface, improvement of the dead volume or pressure resistance of the sensor.

### LOW FLOW RATES

Years of experience and expertise combined with the high sensitivity of our sensors enables flow measurement at extremely low ranges, from nanoliters to milliliters per minute.

### HIGH SPEED

The MEMS sensor integrated on a CMOS chip permits ultra-fast response times – as fast as 20 ms – due to its small thermal mass.

### FLEXIBILITY AND COST EFFICIENCY

With our advanced technology, we have the flexibility to address customer requirements to ensure a customized sensor solution that is both high-performance and cost-efficient.

# Sensing. Anytime. Anywhere.

## SWITZERLAND

### Sensirion AG

Laubisruetistrasse 50  
8712 Staefa  
Switzerland  
Phone +41 44 306 40 00  
Fax +41 44 306 40 30  
info@sensirion.com  
www.sensirion.com

## UNITED STATES

### Sensirion Inc.

11 East Adams, Suite 220  
Chicago, IL 60603  
United States  
Phone +1 312 690 5858  
info-us@sensirion.com  
www.sensirion.com

## CHINA

### Sensirion China Co. Ltd.

Room 1006, Tower 1  
Excellence Meilin Center Plaza (Excellence City)  
ZhongKang Road Shangmeilin  
Futian District, Shenzhen 518049  
P.R. China  
Phone +86 755 8252 1501  
Fax +86 755 8252 1580  
info-cn@sensirion.com  
www.sensirion.com.cn

## JAPAN

### Sensirion Japan Co. Ltd.

Takanawa Kaneo Bldg. 4F  
3-25-22, Takanawa Minato-ku, Tokyo  
108-0074 Japan  
Phone +81 3 3444 4940  
Fax +81 3 3444 4939  
info-jp@sensirion.com  
www.sensirion.co.jp

## KOREA

### Sensirion Korea Co. Ltd.

14056, #1809-#1813 Gumkang Penterium A,  
282, Hagui-Ro, Dongan-Gu  
Anyang-Si, Gyeonggi-Do  
South Korea  
Phone +82 31 337 7700~3  
Fax +82 31 337 7704  
info-kr@sensirion.com  
www.sensirion.co.kr

## TAIWAN

### Sensirion Taiwan Co. Ltd.

Rm. 2, 15F, No. 223, Fuxing 2nd Rd  
Zhubei City  
Hsinchu County, 30271  
Taiwan, R.O.C.  
Phone +886 3 5506701  
Fax +886 3 5506703  
info@sensirion.com  
www.sensirion.com
