# Supplementary material for: Design of a Mechatronics Model of Urinary Bladder and Realization and Evaluation of Its Prototype
Source: Appl Bionics Biomech. 2019 Dec 14;2019:9431781. doi: 10.1155/2019/9431781 (PMC6948342; doi:10.1155/2019/9431781)
Supplement: Supplementary Materials — Among these 3 files, one is the product brochure, one is datasheet of the sensor, and the other is datasheet of the sensor cable. The datasheet of the sensor cable provides us the introduction of the sensor modes (in the manuscript, we use “Volume Counter” mode) and the connection diagram. The other two files are mainly about the introductions of the sensor such as specification charts and patented technology. [file 9431781.f1.zip]

Archive with 3 entries (3 files):
- Sensirion_Liquid_Flow_Meters_Product_Brochure.pdf
- Sensirion_Liquid_Flow_Meters_SCC1-Analog_Sensor_Cable_V4.0.pdf
- Sensirion_Liquid_Flow_Meters_SLI_Datasheet_V11.pdf
